# Supplementary material
Source: Copernicus journal article supplement (doi:10.5194/gmd-19-4797-2026)
Supplement: Supplementary file 1 [file gmd-19-4797-2026-supplement.pdf]

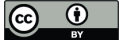

*Supplement of*

## **Ammonia bidirectional flux model tailored for satellite retrieval parameter inversions**

**Michael Sitwell et al.**

*Correspondence to:* Michael Sitwell ([michael.sitwell@ec.gc.ca](mailto:michael.sitwell@ec.gc.ca))

The copyright of individual parts of the supplement might differ from the article licence.

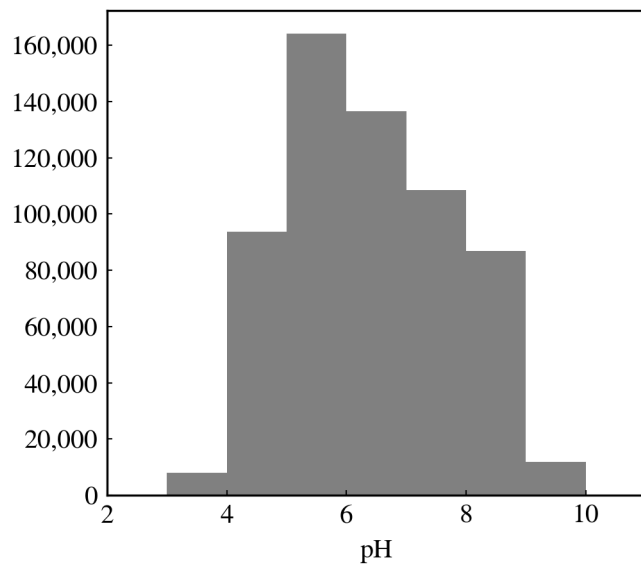

**Figure S1.** Soil pH values from the 2019 compilation of WoSIS soil database.

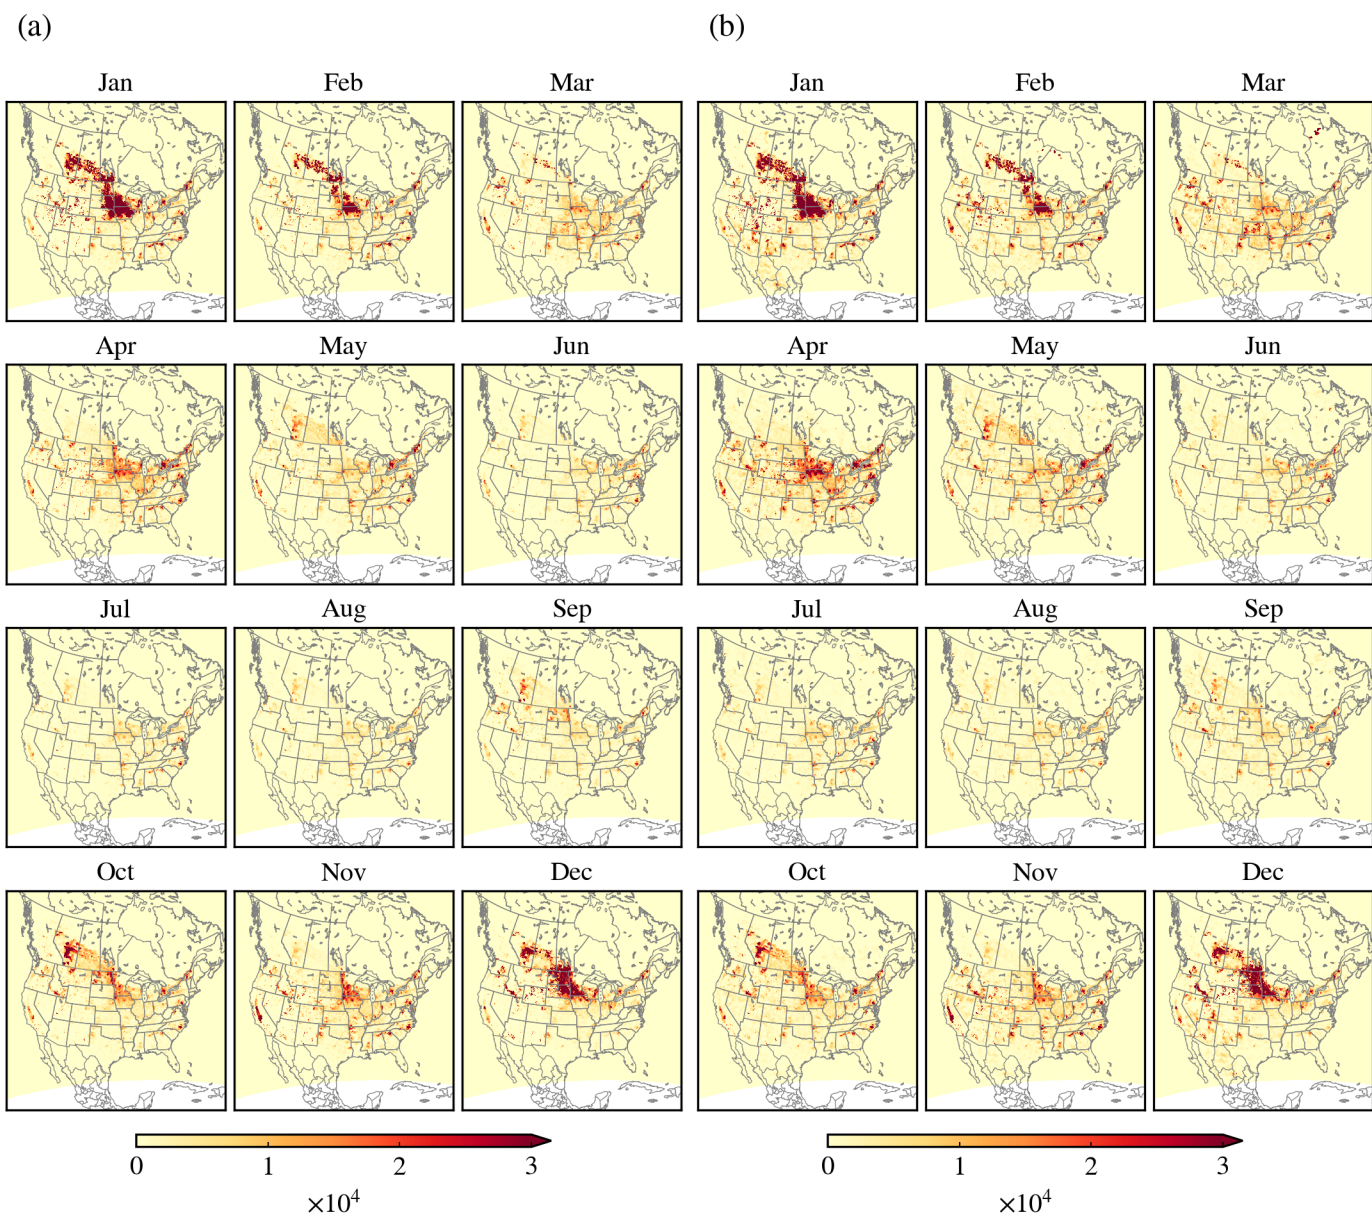

**Figure S2.** Ammonium potential source  $\Gamma_p$  for (a) the background and (b) the analysis.

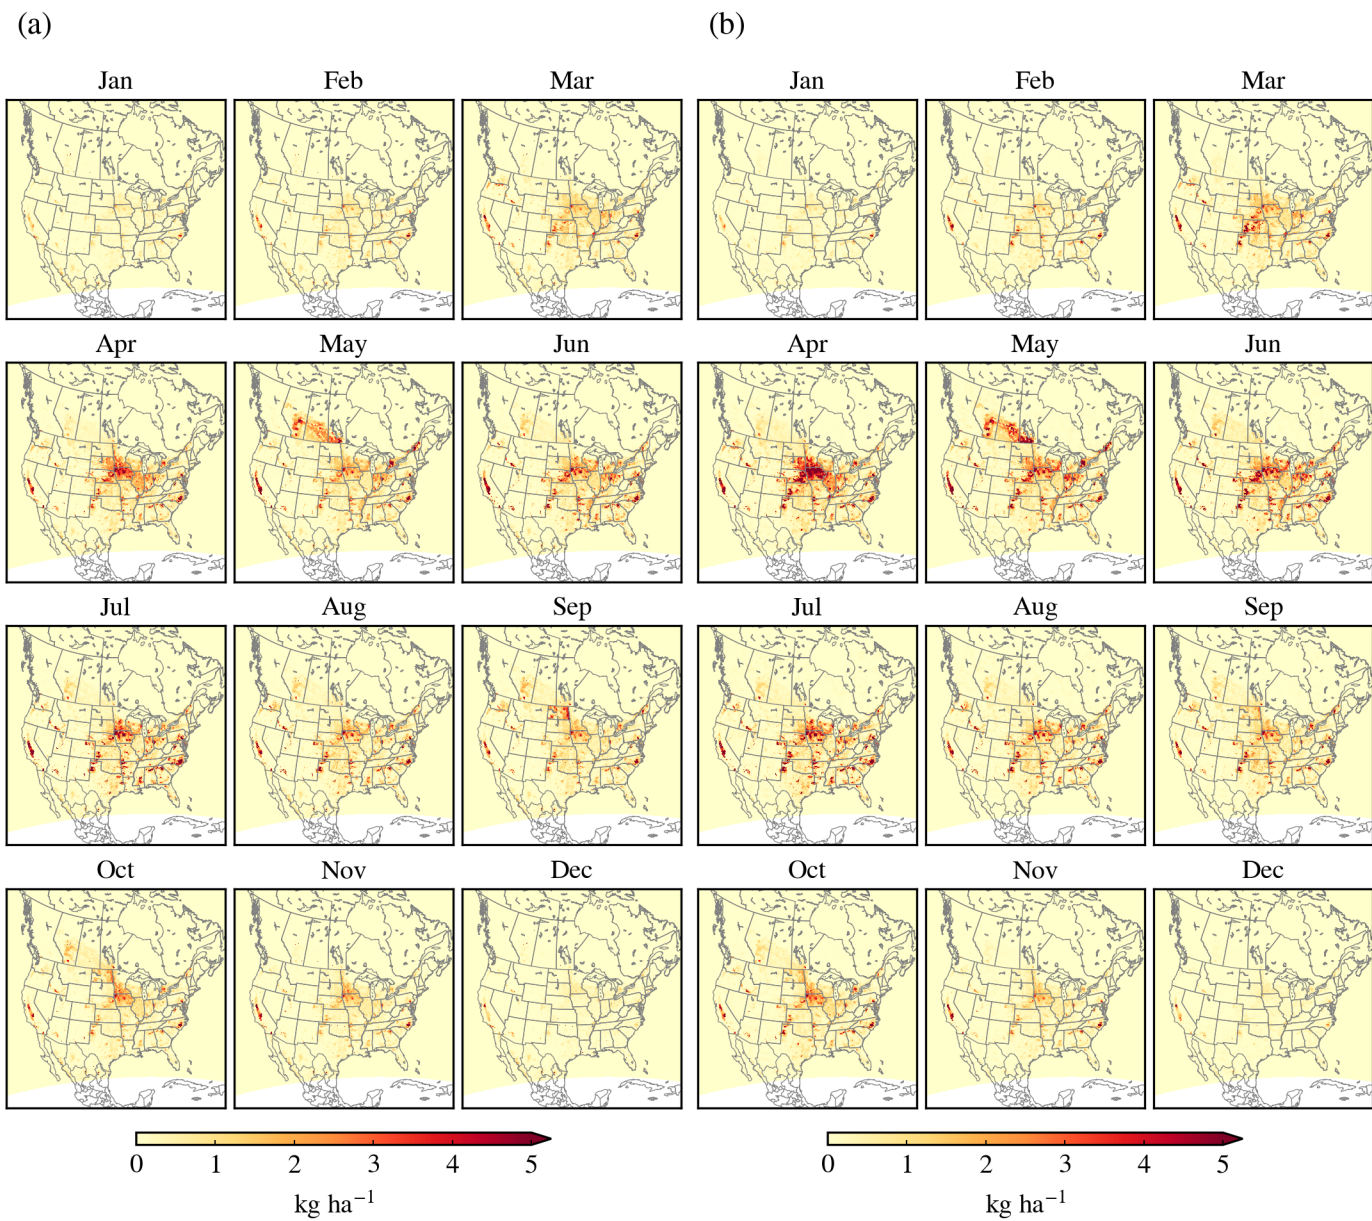

**Figure S3.** Monthly mean ammonia emissions for (a) the inventory-derived background and (b) the inversions.

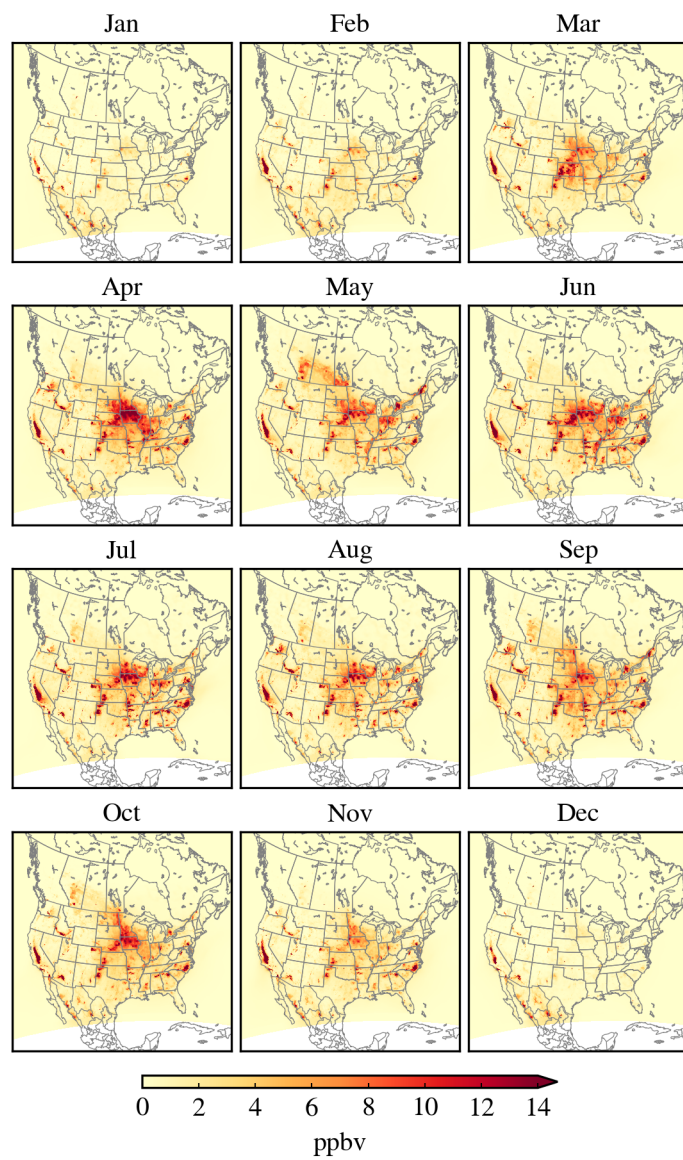

**Figure S4.** Mean ammonia surface concentrations for the unidirectional flux model using inversion-derived parameters.

| month | flux model | bias (%)             | STDE (%)             | $\rho$               | RMSE (%)             |
|-------|------------|----------------------|----------------------|----------------------|----------------------|
| Jan   | unidi      | $-19.3 \pm 4.7$      | $52.6 \pm 3.3$       | $0.55 \pm 0.06$      | $56.0 \pm 3.5$       |
|       | bidi       | $-27.4 \pm 4.9$ (77) | $55.0 \pm 3.5$ (38)  | $0.48 \pm 0.07$ (68) | $61.4 \pm 3.8$ (70)  |
| Feb   | unidi      | $-17.1 \pm 4.5$      | $68.1 \pm 3.2$       | $0.60 \pm 0.04$      | $70.2 \pm 3.3$       |
|       | bidi       | $-24.2 \pm 4.6$ (73) | $69.2 \pm 3.3$ (20)  | $0.55 \pm 0.05$ (72) | $73.3 \pm 3.4$ (49)  |
| Mar   | unidi      | $15.1 \pm 3.1$       | $56.7 \pm 2.2$       | $0.81 \pm 0.02$      | $58.6 \pm 2.2$       |
|       | bidi       | $-9.0 \pm 2.8$ (100) | $51.6 \pm 2.0$ (92)  | $0.80 \pm 0.02$ (39) | $52.4 \pm 2.0$ (96)  |
| Apr   | unidi      | $50.0 \pm 12.8$      | $192.6 \pm 9.1$      | $0.34 \pm 0.06$      | $199.0 \pm 9.3$      |
|       | bidi       | $29.2 \pm 11.9$ (76) | $179.0 \pm 8.4$ (73) | $0.36 \pm 0.06$ (26) | $181.4 \pm 8.5$ (83) |
| May   | unidi      | $20.6 \pm 5.1$       | $78.0 \pm 3.6$       | $0.73 \pm 0.03$      | $80.6 \pm 3.7$       |
|       | bidi       | $6.8 \pm 4.7$ (95)   | $72.2 \pm 3.4$ (76)  | $0.74 \pm 0.03$ (13) | $72.5 \pm 3.4$ (89)  |
| Jun   | unidi      | $13.0 \pm 6.1$       | $92.9 \pm 4.3$       | $0.74 \pm 0.03$      | $93.8 \pm 4.4$       |
|       | bidi       | $-1.4 \pm 5.6$ (92)  | $85.1 \pm 4.0$ (82)  | $0.75 \pm 0.03$ (31) | $85.2 \pm 4.0$ (86)  |
| Jul   | unidi      | $13.7 \pm 7.4$       | $114.7 \pm 5.3$      | $0.58 \pm 0.04$      | $115.5 \pm 5.3$      |
|       | bidi       | $-3.6 \pm 6.5$ (92)  | $99.9 \pm 4.6$ (97)  | $0.58 \pm 0.04$ (16) | $100.0 \pm 4.6$ (97) |
| Aug   | unidi      | $3.3 \pm 5.2$        | $99.3 \pm 3.7$       | $0.64 \pm 0.03$      | $99.3 \pm 3.7$       |
|       | bidi       | $-13.3 \pm 4.4$ (98) | $83.2 \pm 3.1$ (100) | $0.68 \pm 0.03$ (81) | $84.3 \pm 3.1$ (100) |
| Sep   | unidi      | $39.1 \pm 6.5$       | $100.3 \pm 4.6$      | $0.64 \pm 0.04$      | $107.6 \pm 4.9$      |
|       | bidi       | $13.6 \pm 5.2$ (100) | $80.0 \pm 3.7$ (100) | $0.64 \pm 0.04$ (6)  | $81.1 \pm 3.7$ (100) |
| Oct   | unidi      | $27.0 \pm 5.3$       | $79.8 \pm 3.7$       | $0.68 \pm 0.04$      | $84.2 \pm 3.9$       |
|       | bidi       | $0.9 \pm 4.0$ (100)  | $61.2 \pm 2.9$ (100) | $0.72 \pm 0.03$ (72) | $61.2 \pm 2.9$ (100) |
| Nov   | unidi      | $-12.5 \pm 6.1$      | $94.0 \pm 4.4$       | $0.62 \pm 0.04$      | $94.8 \pm 4.4$       |
|       | bidi       | $-32.5 \pm 5.5$ (98) | $84.3 \pm 3.9$ (90)  | $0.68 \pm 0.04$ (89) | $90.4 \pm 4.1$ (54)  |
| Dec   | unidi      | $-34.9 \pm 4.0$      | $61.5 \pm 2.8$       | $0.48 \pm 0.05$      | $70.7 \pm 3.1$       |
|       | bidi       | $-36.5 \pm 4.0$ (21) | $62.7 \pm 2.9$ (23)  | $0.45 \pm 0.05$ (48) | $72.5 \pm 3.2$ (31)  |
| all   | unidi      | $9.1 \pm 1.8$        | $100.0 \pm 1.3$      | $0.62 \pm 0.01$      | $100.5 \pm 1.3$      |
|       | bidi       | $-7.7 \pm 1.6$ (100) | $89.2 \pm 1.2$ (100) | $0.64 \pm 0.01$ (80) | $89.5 \pm 1.2$ (100) |

**Table S1.** Comparison statistics using AMoN ammonia surface observations for the unidirectional ('unidi') and bidirectional ('bidi') flux models. Both flux models use inversion-derived parameters. 'all' under the 'month' column indicates statistics taken over the whole year. Numbers in brackets indicate the statistical significance (as a percentage) of the difference between the statistics values for the unidirectional and bidirectional models.

| month | flux model | bias (%)              | STDE (%)              | $\rho$               | RMSE (%)              |
|-------|------------|-----------------------|-----------------------|----------------------|-----------------------|
| Jan   | unidi      | $-45.2 \pm 21.7$      | $197.3 \pm 15.5$      | $0.49 \pm 0.08$      | $202.4 \pm 15.7$      |
|       | bidi       | $-48.3 \pm 21.7$ (8)  | $198.1 \pm 15.5$ (3)  | $0.50 \pm 0.08$ (7)  | $203.9 \pm 15.9$ (5)  |
| Feb   | unidi      | $-10.9 \pm 10.2$      | $99.5 \pm 7.3$        | $0.38 \pm 0.09$      | $100.1 \pm 7.3$       |
|       | bidi       | $-13.2 \pm 10.4$ (13) | $101.2 \pm 7.4$ (13)  | $0.35 \pm 0.09$ (27) | $102.0 \pm 7.4$ (15)  |
| Mar   | unidi      | $-58.1 \pm 27.1$      | $229.6 \pm 19.4$      | $0.79 \pm 0.05$      | $236.9 \pm 19.8$      |
|       | bidi       | $-65.8 \pm 30.4$ (15) | $257.6 \pm 21.7$ (66) | $0.68 \pm 0.07$ (96) | $265.8 \pm 22.2$ (67) |
| Apr   | unidi      | $-4.2 \pm 19.5$       | $175.1 \pm 13.9$      | $0.67 \pm 0.06$      | $175.2 \pm 13.8$      |
|       | bidi       | $-14.2 \pm 20.3$ (28) | $182.3 \pm 14.5$ (28) | $0.64 \pm 0.07$ (41) | $182.9 \pm 14.4$ (30) |
| May   | unidi      | $23.6 \pm 17.4$       | $170.1 \pm 12.4$      | $0.63 \pm 0.06$      | $171.7 \pm 12.5$      |
|       | bidi       | $18.5 \pm 18.9$ (16)  | $183.9 \pm 13.4$ (55) | $0.55 \pm 0.07$ (81) | $184.8 \pm 13.4$ (52) |
| Jun   | unidi      | $-21.9 \pm 21.4$      | $202.8 \pm 15.2$      | $0.54 \pm 0.08$      | $204.0 \pm 15.2$      |
|       | bidi       | $-21.7 \pm 17.7$ (1)  | $167.6 \pm 12.6$ (93) | $0.71 \pm 0.05$ (99) | $169.0 \pm 12.6$ (92) |
| Jul   | unidi      | $-13.9 \pm 8.0$       | $82.4 \pm 5.7$        | $0.79 \pm 0.04$      | $83.6 \pm 5.8$        |
|       | bidi       | $-14.5 \pm 7.4$ (5)   | $76.2 \pm 5.3$ (58)   | $0.83 \pm 0.03$ (68) | $77.5 \pm 5.3$ (56)   |
| Aug   | unidi      | $-3.2 \pm 21.5$       | $206.4 \pm 15.3$      | $0.36 \pm 0.09$      | $206.4 \pm 15.3$      |
|       | bidi       | $-17.2 \pm 20.8$ (36) | $199.4 \pm 14.8$ (25) | $0.36 \pm 0.09$ (1)  | $200.2 \pm 14.8$ (23) |
| Sep   | unidi      | $-2.7 \pm 15.8$       | $147.0 \pm 11.2$      | $0.76 \pm 0.05$      | $147.1 \pm 11.2$      |
|       | bidi       | $-11.2 \pm 16.8$ (28) | $157.1 \pm 12.0$ (46) | $0.72 \pm 0.05$ (61) | $157.5 \pm 12.0$ (48) |
| Oct   | unidi      | $1.9 \pm 16.6$        | $162.6 \pm 11.8$      | $0.38 \pm 0.09$      | $162.6 \pm 11.8$      |
|       | bidi       | $-6.7 \pm 15.6$ (29)  | $152.9 \pm 11.1$ (45) | $0.43 \pm 0.08$ (41) | $153.1 \pm 11.1$ (44) |
| Nov   | unidi      | $-27.7 \pm 9.7$       | $91.5 \pm 6.9$        | $0.47 \pm 0.08$      | $95.5 \pm 7.2$        |
|       | bidi       | $-32.2 \pm 9.0$ (27)  | $85.1 \pm 6.4$ (50)   | $0.53 \pm 0.08$ (54) | $91.0 \pm 6.8$ (35)   |
| Dec   | unidi      | $-8.6 \pm 7.3$        | $71.1 \pm 5.2$        | $0.42 \pm 0.09$      | $71.7 \pm 5.2$        |
|       | bidi       | $-13.0 \pm 7.5$ (32)  | $72.6 \pm 5.3$ (16)   | $0.36 \pm 0.09$ (50) | $73.8 \pm 5.4$ (22)   |
| all   | unidi      | $-13.1 \pm 4.8$       | $159.1 \pm 3.4$       | $0.57 \pm 0.02$      | $159.6 \pm 3.4$       |
|       | bidi       | $-18.7 \pm 4.8$ (59)  | $159.2 \pm 3.4$ (2)   | $0.56 \pm 0.02$ (23) | $160.3 \pm 3.4$ (11)  |

**Table S2.** Same as Table S1 but for NAPS.

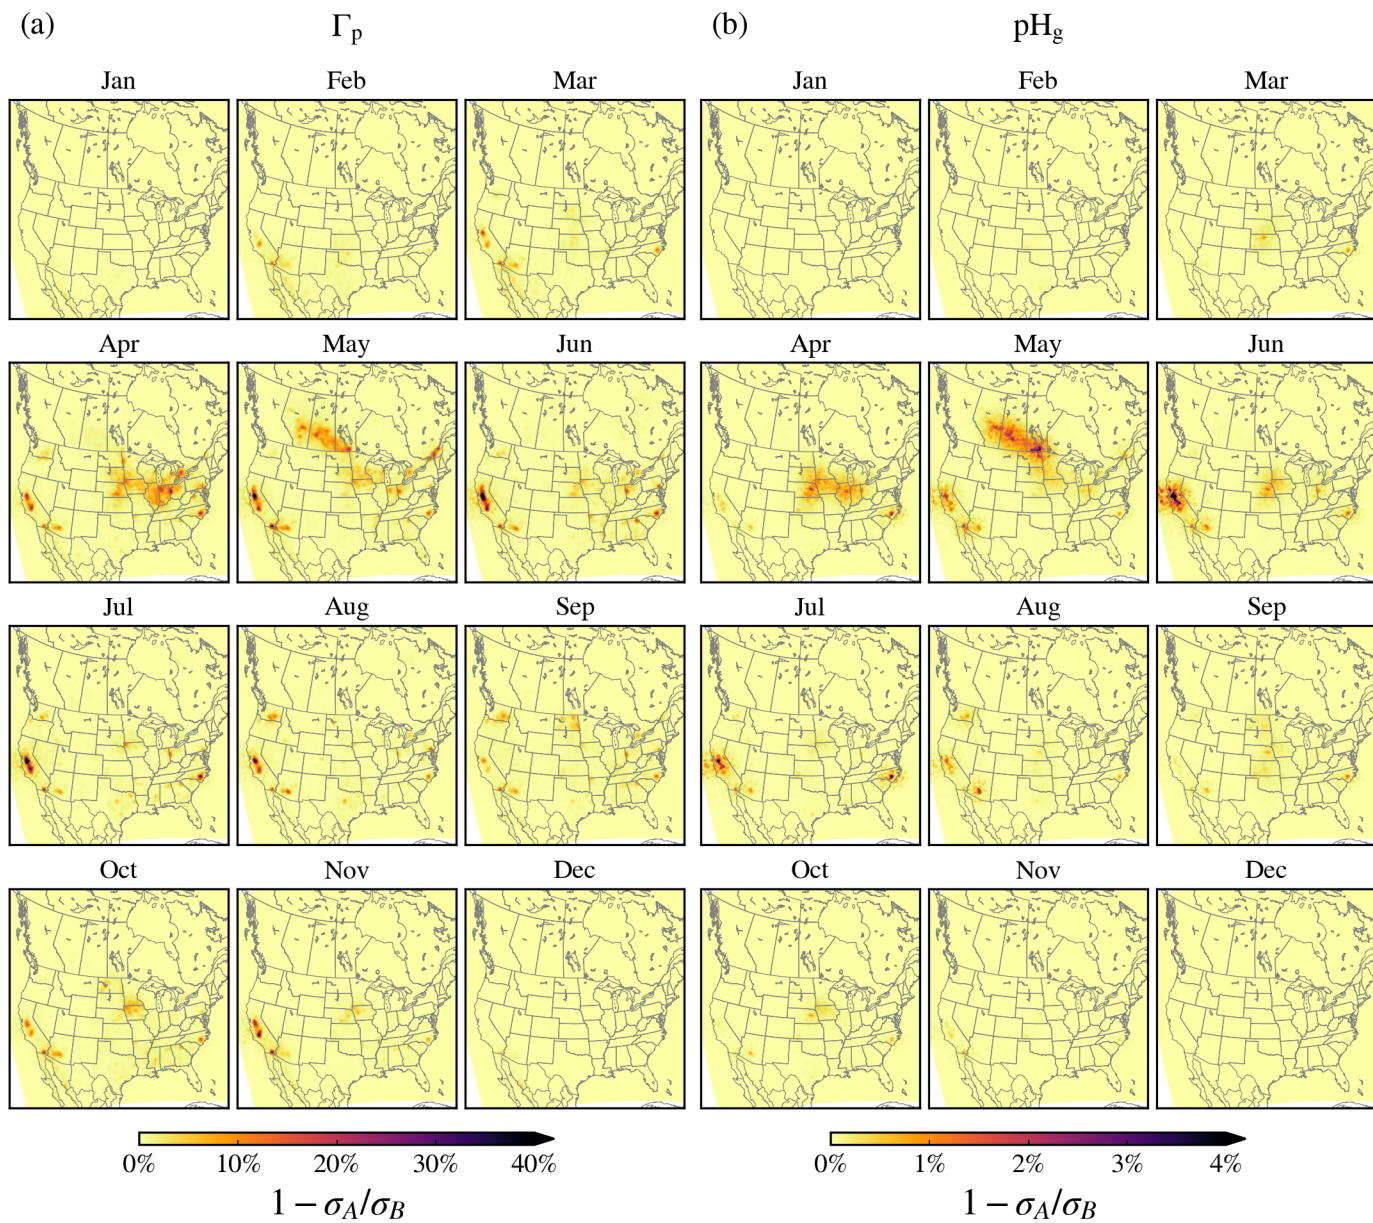

**Figure S5.** Reduction of the analysis (a posterior) uncertainties  $\sigma_A$  relative to the background (a priori) uncertainties  $\sigma_B$  for the inversion parameters (a)  $\Gamma_p$  and (b)  $pH_g$ .

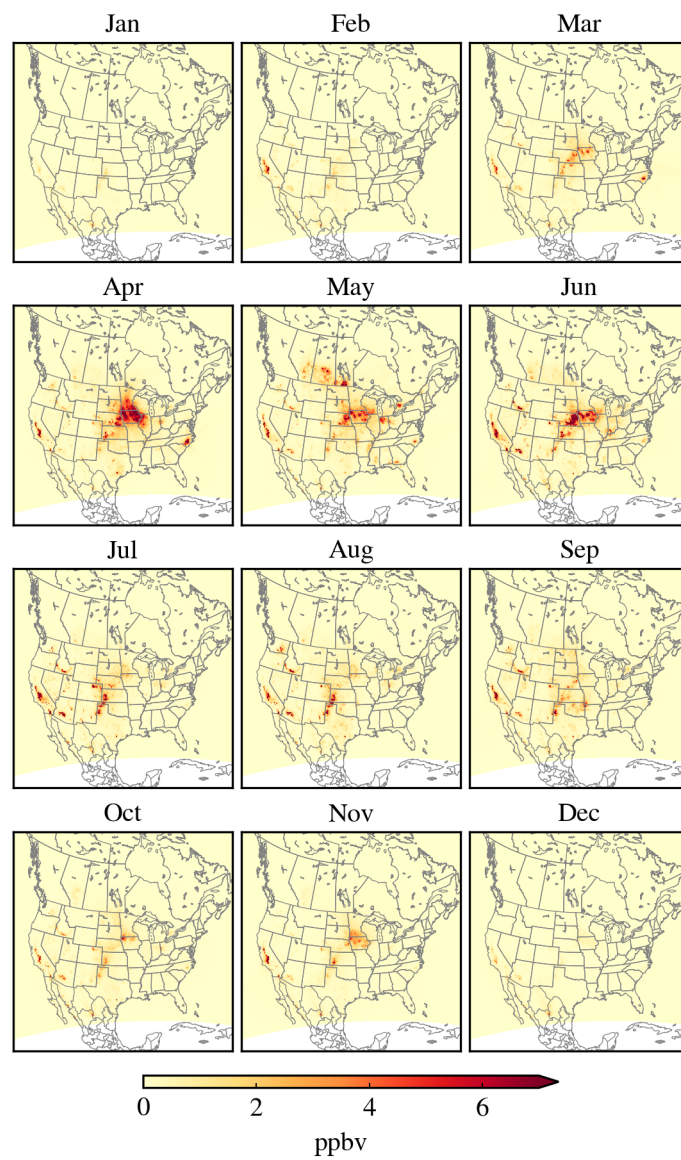

**Figure S6.** Root mean square differences in ammonia surface concentrations between bidirectional flux models. The first bidirectional flux model has both  $\Gamma_p$  and  $pH_g$  derived from inversions. The second bidirectional flux model has only  $\Gamma_p$  inversion-derived and  $pH_g$  set from values from the WoSIS pH database.

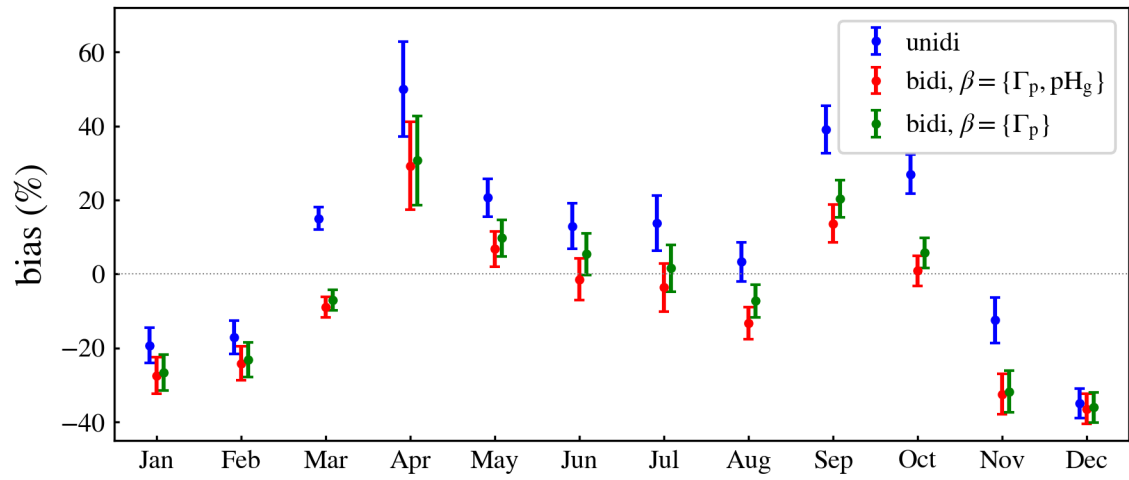

**Figure S7.** Biases of the unidirectional model (with inversion-derived emissions; blue), the bidirectional flux model with both  $\Gamma_p$  and  $\text{pH}_g$  set from inversions (red), and the bidirectional flux model with only  $\Gamma_p$  set from inversions and  $\text{pH}_g$  set from values from the WoSIS pH database (green) as compared to AMoN observations for 2016. Error bars indicate the  $1\sigma$  confidence interval.
